# Supplementary material for: Molecular Basis of Resistance to Muramidase and Cationic Antimicrobial Peptide Activity of Lysozyme in Staphylococci
Source: PLoS Pathog. 2007 Jul 27;3(7):e102. doi: 10.1371/journal.ppat.0030102 (PMC1933452; doi:10.1371/journal.ppat.0030102)
Supplement: Dataset S1 — (36 KB XLS) [file ppat.0030102.sd001.xls]

## Sheet: Sylvia_2
NCBI Identifier (whole genome Stapholococcus aureus N315)
GenBank: BA000018.3
Ref Seq: NC_002745.2
locus tag	gen	function	PID
SA0616	vraF	ABC transporter ATP-binding protein	15926338											NCBI Identifier (whole genome Stapholococcus aureus N315)
SA0617	vraG	ABC transporter permease	15926339											GenBank: BA000018.3
SA0016	purA	Adenylosuccinate synthase	15925722											Ref Seq: NC_002745.2
SA0017	vicR	Response regulator	15925723
SA0027		Truncated replication protein for plasmid	15925733
SA0037		HP	15925744
SA0077		HP	15925785
SA0081		HP	15925789
SA0090		HP	15925798
SA0100		HP	15925808
SA0106	lctP	Lactate transporter, LctP family	15925814
SA0108	sarS	Staphylococcal accessory regulator A homologue	15925816
SA0109	sirC	Lipoprotein	15925817
SA0111	sirA	Lipoprotein	15925819
SA0133	deoC1	Deoxyribose-phosphate aldolase	15925842
SA0134	deoB	Phosphopentomutase	15925843
SA0138		HP, similar to alkylphosphonate ABC transporter	15925847
SA0143	adhE	Alcohol-acetaldehyde dehydrogenase	15925852
SA0151	capH	Capsular polysaccharide synthesis enzyme O-acetyltransferase Cap5H	15925860
SA0152	capI	Capsular polysaccharide synthesis enzyme Cap5I	15925861
SA0153	capJ	Capsular polysaccharide synthesis enzyme Cap5J	15925862
SA0154	capK	Capsular polysaccharide synthesis enzyme Cap5K	15925863
SA0161		HP	15925870
SA0175		HP	15925885
SA0180		Branched-chain amino acid:cation transporter	15925890
SA0204	azoR	FMN-dependent NADH-azoreductase	15925915
SA0207		HP, similar to maltose/maltodextrin-binding protein	15925918
SA0208		Maltose/maltodextrin transport permease homologue	15925919
SA0213		HP	15925924
SA0220		HP, similar to glycerophosphodiester phosphodiesterase	15925931
SA0221		HP	15925932
SA0222	coa	Staphylocoagulase precursor	15925933
SA0231		HP, similar to flavohemoprotein	15925943
SA0252	lrgA	holin-like protein LrgA	15925965
SA0262		HP	15925975
SA0268		HP, similar to ABC transporter system permease protein	15925981
SA0270		HP, similar to secretory antigen precursor SsaA	15925983
SA0271	esxA	Virulence factor EsxA	15925984
SA0272	esaA	Protein EsaA	15925985
SA0273	essA	Protein EssA	15925986
SA0276	essC	Protein EssC	15925989
SA0279		HP	15925992
SA0283		HP	15925996
SA0291		HP	15926004
SA0292		HP	15926005
SA0295		HP, similar to outer membraneprotein precursor	15926008
SA0309	geh	Glycerol ester hydrolase, lipase 2	15926022
SA0378		HP	15926094
SA0381		HP	15926098
SA0408		HP	15926126
SA0423	aaa	N-acetylmuramoyl-L-alanine amidase	15926142
SA0424		HP	15926143
SA0427		HP	15926146
SA0469	ftsH	cell-division protein	15926188
SA0470	hslO	Heat-shock protein HSP33 homologue	15926189
SA0480	ctsR	Transcription repressor of class III stress genes homologue	15926199
SA0481		HP	15926200
SA0484	radA	DNA repair protein homologue	15926203
SA0509	hchA	Molecular chaperoneHchA	15926229
SA0515		HP, similar to deoxypurine kinase	15926235
SA0518	azo1	FMN-dependent NADPH-azoreductase	15926238
SA0519	sdrC	Ser-Asp rich fibrinogen-binding, bone sialoprotein-binding protein	15926239
SA0521	sdrE	Ser-Asp rich fibrinogen-binding, bone sialoprotein-binding protein	15926241
SA0558		HP	15926279
SA0614	graR		15926336
SA0620		HP, similar to secretory antigen precursor SsaA	15926342
SA0623		HP	15926345
SA0641	mgrA	HTH-type transcriptional regulator mgrA, MarR family	15926363
SA0651		HP	15926373
SA0708	secA	preprotein translocase subunit	15926430
SA0719	trxB	Thioredoxine reductase	15926441
SA0728	pgk	Phosphoglycerate kinase	15926450
SA0729	tpiA	Triosephosphate isomerase	15926451
SA0730	gpml	2, 3-diphosphoglycerate-independentphosphoglycerate mutase	15926452
SA0731	eno	Enolase (2-phosphoglycerate dehydrogenase)	15926453
SA0738		HP	15926460
SA0739		HP	15926461
SA0772		HP	15926500
SA0793	dltA	D-alanine-D-alanyl carrier protein ligase	15926521
SA0794	dltB	DltB membrane protein	15926522
SA0796	dltD	Poly (glycerophosphate chain) D-alanine transfer protein	15926524
SA0804		HP	15926532
SA0805		HP	15926533
SA0822	argG	Argininosuccinate synthase	15926550
SA0829		HP, similar to 5-oxo-1,2,5-tricarboxillic-3-penten acid decarboxylase	15926557
SA0831	cdr	Coenzyme A disulfide reductase	15926559
SA0832		HP	15926560
SA0833		HP	15926561
SA0842	fabH	3-oxoacyl-(acyl-carrier-protein) synthase 3	15926572
SA0845	oppB	Oligopeptide transport system permease protein	15926575
SA0846		HP, similar to oligopeptide transport system permease protein OppC	15926576
SA0849		HP, similar to peptide binding protein OppA	15926579
SA0854		HP, similar to oligopeptide transport system permease protein OppC	15926584
SA0856	spxA	Transcriptional regulator Spx	15926586
SA0859		Thimet oligopeptidase homologue	15926589
SA0860		HP	15926590
SA0890		HP	15926624
SA0903		HP	15926637
SA0905	atlA	autolysin (N-acetylmuramoyl-L-alanine amidase/endo-beta-N-acetylglucosaminidase)	15926639
SA0915	folD	FolD bifunctional protein	15926649
SA0916	purE	Putative phosphoribosylaminoimidazole carboxylase PurE	15926650
SA0917	purK	Phosphoribosylaminoimidazole carboxylase ATPase subunit	15926651
SA0918	purC	Phosphoribosylaminoimidazole-succinocarboxamide synthase	15926652
SA0920	purQ	Phosphoribosylformylglycinamidine synthase I PurQ	15926654
SA0921	purL	Phosphoribosylformylglycinamidine synthetase PurL	15926655
SA0922	purF	Phosphoribosylpyrophosphate amidotransferase PurF	15926656
SA0923	purM	Phosphoribosylformylglycinamidine cyclo-ligase PurM	15926657
SA0924	purN	Phosphoribosylglycinamide formyltransferase	15926658
SA0925	purH	Bifunctional purine biosynthesis protein PurH	15926659
SA0926	purD	Phosphoribosylamine-glycine ligase PurD	15926660
SA0937		Cytochrome D ubiquinol oxidase subunit 1 homolog	15926672
SA0958		Putative myo-inositol-1 (or 4)-monophosphatase	15926692
SA0997	murl	Glutamate racemase	15926734
SA0998		HAM1 protein homolog	15926735
SA1003	fib	HP, similar to fibrinogen-binding protein	15926741
SA1004		HP, similar to fibrinogen-binding protein	15926742
SA1013		HP, similar to carbamate kinase	15926753
SA1056		HP	15926796
SA1071	fabR	Transcription factor FapR	15926811
SA1072	plsX	Fatty acid/phospholipid synthesis protein	15926812
SA1073	fabD	Malonyl CoA-acyl carrier protein transacylase	15926813
SA1074	fabG	3-oxoacyl-reductase, (acyl-carrier protein) reductase	15926814
SA1088	sucC	Succinyl-CoA synthetase, beta chain	15926828
SA1089	sucD	Succinyl-CoA synthetase, alpha chain	15926829
SA1096	clpQ	Heat shock protein HslV	15926836
SA1098	codY	Transcription pleiotropic repressor CodY	15926838
SA1105		Putative zinc metalloprotease	15926845
SA1127	cinA	Competence-damage inducible protein CinA	15926867
SA1138	mutL	DNA mismatch repair protein	15926879
SA1140	glpF	Gycerol uptake facilitator	15926882
SA1151		HP	15926893
SA1172		HP, similar toGMP reductase	15926918
SA1173		HP	15926919
SA1184	acnA	Aconitate hydratase	15926930
SA1206	femA	Aminoacyltransferase femA (factor essential for expression of methicillin resistance)	15926954
SA1212 opp-2D		Oligopeptide transport ATPase	15926960
SA1214 opp-2B		Oligopeptide transporter membrane permease domain	15926962
SA1225	lysC	Aspartokinase II	15926973
SA1237	xpaC	HP, similar to 5-bromo-4-chloroindolyl phosphate hydrolysis protein	15926985
SA1238		HP, similar to tellurite resistance protein	15926986
SA1255	crr	Glucose-specific phosphotransferase enzyme IIA component	15927003
SA1269	norB	Blt-like protein, efflux pump	15927017
SA1270		HP, similar to acid permease	15927018
SA1271		Threonine deaminase IlvA homolog	15927019
SA1272	ald1	Alanine dehydrogenase	15927020
SA1280		HP, conserved	15927028
SA1289		Putative bifunctional biotin ligase/biotin operon repressor	15927037
SA1312	ebpS	Elastin binding protein	15927062
SA1336		Glucose-6-phosphate 1-dehydrogenase	15927086
SA1347 bfmBAB	Branched-chain alpha-keto acid dehydrogenase E1		15927097
SA1349		Dihydrolipoamide dehydrogenase	15927099
SA1365	gevPB	glycine dehydrogenase (decarboxylating) subunit 2 homolog	15927115
SA1366	gevPA	glycine dehydrogenase (decarboxylating) subunit 1	15927116
SA1367	gcvT	Aminomethyltransferase	15927117
SA1408	dnaJ	DnaJ protein (HSP40)	15927159
SA1409	dnaK	DnaK protein	15927160
SA1410	grpE	GrpE protein (HSP-70 Cofactor HSP20)	15927161
SA1411	hrcA	Heat-inducible transcriptional repressor	15927162
SA1502	rplT	50S ribosomal protein L20	15927257
SA1512		HP, similar to formamidopyrimidine-DNA glycosylase	15927267
SA1517	citC	Isocitrate dehyrogenase	15927272
SA1518	citZ	Citrate synthase II	15927273
SA1519	aapA	D-serine/D-alanine/glycine TRANSPORTER	15927274
SA1534		HP	15927289
SA1535	tpx	HP, similar to thioredoxin peroxidase	15927290
SA1553	fhs	Formyltetrahydrofolate synthetase	15927309
SA1583	rot	Repressor of toxins Rot	15927339
SA1653	TRAP	Signal transduction protein TRAP	15927409
SA1654		HP, similar to ABC transporter ecsB	15927410
SA1655		ABC transporter ecsA homolog	15927411
SA1663		HP, belongs to the UPF0342 protein family	15927419
SA1678	furB	Transcriptional regulator Fur family homolog	15927435
SA1690	recX	Regulatory protein RecX	15927447
SA1709		HP, similar to ferritin	15927467
SA1723		HP	15927481
SA1724	purB	Adenylosuccinate lyase	15927482
SA1760		holin homolog (Bacteriophage phiN315)	15927522
SA1766		HP (Bacteriophage phiN315)	15927531
SA1785		HP (Bacteriophage phiN315)	15927551
SA1793		HP (Bacteriophage phiN315)	15927559
SA1811	hlb	Truncated beta-hemolysin	15927579
SA1812	lukM	Leukocidin chain lukM	15927580
SA1813	lukF	Synergohymentropic toxin precursor	15927581
SA1828		HP	15927596
SA1914	upp	Uracil phosphoribosyl transferase	15927686
SA1915	glyA	Serine hydroxymethyl transferase	15927687
SA1916		HP, belongs to the UPF0340 protein family	15927688
SA1937		HP	15927709
SA1938	pdp	Pyrimidine nucleoside phosphorylase	15927710
SA1939		Deoxyribose-phosphate aldolase	15927711
SA1960	mtlF	PTS system, mannitol specific IIBC component	15927737
SA1979		HP, similar to ferrichrome ABC transporter	15927757
SA1984	asp23	Alkaline shock protein 23, ASP23	15927762
SA1996	lacB	Galactose-6-phosphate isomerase LacB subunit	15927774
SA2001		HP, similar to oxidoreductase, aldo/ketoreductase family	15927780
SA2005		HP	15927784
SA2008	alsS	Alpha-acetolactate synthase	15927787
SA2050		HP	15927833
SA2056		HP, similar to acriflavin resistance protein	15927841
SA2081		Urea transporter	15927867
SA2082	ureA	Urease gamma subunit	15927868
SA2083	ureB	Urease beta subunit	15927869
SA2084	ureC	Urease alpha subunit	15927870
SA2085	ureE	Urease accessory protein UreE	15927871
SA2086	ureF	Urease accessory protein UreF	15927872
SA2087	ureG	Urease accessory protein UreG	15927873
SA2088	ureD	Urease accessory protein UreD	15927874
SA2097		HP, similar to secretory antigen precursor SsaA	15927884
SA2101		HP	15927888
SA2138		HP	15927928
SA2153		HP	15927943
SA2156		L-lactate permease IctP homolog	15927946
SA2160		HP	15927950
SA2174		HP, similar to transcriptional regulator	15927964
SA2198		HP	15927988
SA2207	hlgA	Gamma-hemolysin component A	15927997
SA2209	hlgB	Gamma-hemolysin component B	15927999
SA2217		HP, similar to lipoprotein inner membrane ABC-transporter	15928007
SA2234 oupCD	Probable glycine betaine/carnitine/choline ABC transporter opuCD	M	15928024
SA2256		HP	15928047
SA2296		HP, similar to transcriptional regulator, MerR family	15928087
SA2297		HP	15928088
SA2301		HP, similar to GTP-pyrophosphokinase	15928092
SA2302	stpC	HP, similar to ABC transporter	15928093
SA2303	smpC	HP, similar to membrane spanning protein	15928094
SA2304	fbp	Fructose-bisphosphatase	15928095
SA2312	ddh	D-specific D-2-hydroxyacid dehydrogenase	15928103
SA2318	sdhA	Putative L-serine dehydratase	15928109
SA2319	sdhB	Putative beta-subunit of L-serine dehydratase	15928110
SA2320	pfoR	Putative regulatory protein PfoR	15928111
SA2324		HP, similar to thioredoxin	15928115
SA2332		HP	15928123
SA2339		HP	15928131
SA2354	oatA	O-acetyltransferase A	15928146
SA2373		HP	15928166
SA2410	nrdD	Anaerobic ribonucleoside-triphosphate reductase	15928203
SA2418		HP, similar to two-component response regulator	15928211
SA2431	isaB	Immunodominant antigen B	15928224
SA2449		HP	15928242
SA2457	capA	Capsular polysaccharide biosynthesis, capA	15928250
SA2459	icaA	Intercellular adhesion protein A	15928252
SA2460	icaD	Intercellular adhesion protein D	15928253
SA2461	icaB	Intercellular adhesion protein B	15928254
SA2462	icaC	Intercellular adhesion protein C	15928255
SA2474		HP	15928268
SA2475		HP, belongs to ABC-transporter	15928269
SA2477		HP, belongs to the UPF0397 protein family	15928271
SA2480	drp35	Lactonase Drp35	15928274
